# Supplementary material for: Mushrooms Do Produce Flavonoids: Metabolite Profiling and Transcriptome Analysis of Flavonoid Synthesis in the Medicinal Mushroom Sanghuangporus baumii
Source: MDPI journal article supplement (doi:10.3390/jof8060582), 2022-05-29

**Table S1.** List of primers used in this study.

| Name                 | Sequence (5'-3')                            |
|----------------------|---------------------------------------------|
| <i>PAL</i> -F        | TCATCCTCCATTCCATCCCA                        |
| <i>PAL</i> -R        | TCGCAGCAACTCTTCCTTTT                        |
| <i>PAL</i> -B        | GCTGATATCGGATCCATGGTCATCAACTCTGACGG         |
| <i>PAL</i> -H        | TGCGGCCGCAAGCTTTCACCTCCTCAGCGGCAAACA        |
| pAN7-F               | AGTAGATGCCGACCGCGGGA                        |
| pAN7-R               | GGTGATGTCTGCTCAAGCGGG                       |
| <i>PAL</i> -iF-F     | TGAGCAGACATCACCATGGTCATCAACTCTGACGGTC       |
| <i>PAL</i> -iF-R     | CGGTCGGCATCTACTTCACCTCCTCAGCGGCAAACAT       |
| <i>hph</i> -F        | GAGCCTGACCTATTGCATCT                        |
| <i>hph</i> -R        | GTCTGCTGCTCCATACAAGC                        |
| <i>PAL2</i> -F       | TCAGTCCAACATTTGTTGCCA                       |
| <i>PAL2</i> -R       | GGGAGGTGTGTGCGTTGTAGA                       |
| <i>PAL</i> -qF       | GCACCCGACGCACTCAAAT                         |
| <i>PAL</i> -qR       | AAGGCCGTACCGTTCAAAATC                       |
| <i>4CL</i> -qF       | CCCTTCTGTGCTATTCTTCTGG                      |
| <i>4CL</i> -qR       | ATTGTTCTATCCTTGCCGTGTC                      |
| <i>IFR</i> -qF       | TTGCTGTGAAAAAGGGAGGTG GAAATGTCAAATCCGAATCGC |
| <i>IFR</i> -qR       | GATGTCCATTTCGCCACGGTA                       |
| <i>PKS</i> -qF       | GAATGCCATAGCACCTCAGA                        |
| <i>PKS</i> -qR       |                                             |
| $\alpha$ -tubulin-qF | CCAGCAAGCGTTACCGATT                         |
| $\alpha$ -tubulin-qR | TCCACGACGTCCATCGTTC                         |

Note: The underlined parts of *PAL*-B and *PAL*-H primers are respectively *Bam*HI and *Hind*III restriction sites.

**Table S2.** Flavonoids from the mycelia of *S. baumii*.

| Compound                                   | Ion mode | Peak area  | Formula                                         | Class        | CAS         |
|--------------------------------------------|----------|------------|-------------------------------------------------|--------------|-------------|
| 5-Hydroxy-7-methoxyflavone                 | Negative | 7580.90    | C <sub>16</sub> H <sub>12</sub> O <sub>4</sub>  | Flavones     | -           |
| Galangin (3,5,7-Trihydroxyflavone)         | Negative | 2542.40    | C <sub>15</sub> H <sub>10</sub> O <sub>5</sub>  | Flavones     | 548-83-4    |
| 6-Hydroxydaidzein                          | Positive | 124290.00  | C <sub>15</sub> H <sub>10</sub> O <sub>5</sub>  | Isoflavones  | 17817-31-1  |
| Luteolin (5,7,3',4'-Tetrahydroxyflavone)   | Negative | 8221.60    | C <sub>15</sub> H <sub>10</sub> O <sub>6</sub>  | Flavones     | 491-70-3    |
| 3,4,2',4',6'-Pentahydroxychalcone          | Positive | 45986.00   | C <sub>15</sub> H <sub>12</sub> O <sub>6</sub>  | Chalcones    | 73692-51-0  |
| 2-Hydroxynaringenin                        | Negative | 11149.00   | C <sub>15</sub> H <sub>12</sub> O <sub>6</sub>  | Flavones     | -           |
| Catechin                                   | Negative | 13744.00   | C <sub>15</sub> H <sub>14</sub> O <sub>6</sub>  | Flavanols    | 154-23-4    |
| Epicatechin                                | Positive | 30712.00   | C <sub>15</sub> H <sub>14</sub> O <sub>6</sub>  | Flavanols    | 490-46-0    |
| 4'-Hydroxy-5,7-dimethoxyflavanone          | Negative | 3749600.00 | C <sub>17</sub> H <sub>16</sub> O <sub>5</sub>  | Flavanols    | -           |
| Taxifolin                                  | Positive | 21547.00   | C <sub>15</sub> H <sub>12</sub> O <sub>7</sub>  | Flavones     | 480-18-2    |
| Epigallocatechin                           | Negative | 3840.90    | C <sub>15</sub> H <sub>14</sub> O <sub>7</sub>  | Flavanols    | 970-74-1    |
| Isobavachalcone D                          | Positive | 34071.00   | C <sub>19</sub> H <sub>20</sub> O <sub>4</sub>  | Chalcones    | -           |
| 3-O-Acetylpinobanksin                      | Negative | 3209.30    | C <sub>17</sub> H <sub>14</sub> O <sub>6</sub>  | Flavanonols  | 52117-69-8  |
| Quercetagenin                              | Positive | 74531.00   | C <sub>15</sub> H <sub>10</sub> O <sub>8</sub>  | Flavonols    | 90-18-6     |
| Gancaoanin G                               | Negative | 11933.00   | C <sub>21</sub> H <sub>20</sub> O <sub>5</sub>  | Isoflavones  | 126716-34-5 |
| Tangeretin                                 | Positive | 5374.80    | C <sub>20</sub> H <sub>20</sub> O <sub>7</sub>  | Flavonols    | 481-53-8    |
| Nobiletin                                  | Positive | 7655.10    | C <sub>21</sub> H <sub>22</sub> O <sub>8</sub>  | Flavones     | 478-01-3    |
| Apigenin-7-O-glucoside                     | Positive | 8730.20    | C <sub>21</sub> H <sub>20</sub> O <sub>10</sub> | Flavones     | 578-74-5    |
| Genistein-7-O-galactoside                  | Positive | 7158.10    | C <sub>21</sub> H <sub>20</sub> O <sub>10</sub> | Isoflavones  | -           |
| Apigenin-7-O- $\alpha$ -D-glucopyranoside  | Positive | 9012.50    | C <sub>21</sub> H <sub>20</sub> O <sub>10</sub> | Flavones     | -           |
| Apigenin-3'-O- $\alpha$ -D-glucopyranoside | Positive | 11641.00   | C <sub>21</sub> H <sub>20</sub> O <sub>10</sub> | Flavones     | -           |
| 7-O-Galloyltricetiflavan                   | Negative | 13607.00   | C <sub>22</sub> H <sub>18</sub> O <sub>10</sub> | Flavanols    | -           |
| Epicatechin gallate                        | Negative | 14254.00   | C <sub>22</sub> H <sub>18</sub> O <sub>10</sub> | Flavanols    | 1257-08-5   |
| Catechin gallate                           | Negative | 13965.00   | C <sub>22</sub> H <sub>18</sub> O <sub>10</sub> | Flavanols    | 130405-40-2 |
| Prunetin-4'-O-glucoside                    | Negative | 460880.00  | C <sub>22</sub> H <sub>22</sub> O <sub>10</sub> | Isoflavones  | 154-36-9    |
| Trifolirhizin                              | Negative | 139630.00  | C <sub>22</sub> H <sub>22</sub> O <sub>10</sub> | Isoflavanone | 6807-83-6   |
| Kaempferol-7-O-glucoside                   | Negative | 20634.00   | C <sub>21</sub> H <sub>20</sub> O <sub>11</sub> | Flavonols    | 16290-07-6  |
| Trifolin                                   | Negative | 21323.00   | C <sub>21</sub> H <sub>20</sub> O <sub>11</sub> | Flavonols    | 23627-87-4  |
| Dihydrokaempferol-3-O-glucoside            | Positive | 5569.80    | C <sub>21</sub> H <sub>22</sub> O <sub>11</sub> | Flavanonols  | 1049-08-8   |

| Compound                                 | Ion mode | Peak area  | Formula                                         | Class             | CAS         |
|------------------------------------------|----------|------------|-------------------------------------------------|-------------------|-------------|
| Epigallocatechin-3-gallate               | Negative | 24306.00   | C <sub>22</sub> H <sub>18</sub> O <sub>11</sub> | Flavanols         | 989-51-5    |
| Gallocatechin 3-O-gallate                | Negative | 21262.00   | C <sub>22</sub> H <sub>18</sub> O <sub>11</sub> | Flavanols         | 5127-64-0   |
| (-)-Gallocatechin gallate                | Positive | 21819.00   | C <sub>22</sub> H <sub>18</sub> O <sub>11</sub> | Flavones          | 4233-96-9   |
| Kaempferol-3-O-glucuronide               | Negative | 5549.50    | C <sub>21</sub> H <sub>18</sub> O <sub>12</sub> | Flavonols         | 22688-78-4  |
| Luteolin 7-O-glucuronide                 | Positive | 4403.00    | C <sub>21</sub> H <sub>18</sub> O <sub>12</sub> | Flavones          | 29741-10-4  |
| 8-Methoxykaempferol-7-O-rhamnoside       | Negative | 4431.60    | C <sub>22</sub> H <sub>22</sub> O <sub>11</sub> | Flavonols         | -           |
| Quercetin-7-O-glucoside                  | Negative | 8272.30    | C <sub>21</sub> H <sub>20</sub> O <sub>12</sub> | Flavonols         | 491-50-9    |
| Isoquercitrin                            | Negative | 6347.10    | C <sub>21</sub> H <sub>20</sub> O <sub>12</sub> | Flavonols         | 482-35-9    |
| Hyperin                                  | Negative | 8540.20    | C <sub>21</sub> H <sub>20</sub> O <sub>12</sub> | Flavonols         | 482-36-0    |
| Spiraeoside                              | Negative | 13059.00   | C <sub>21</sub> H <sub>20</sub> O <sub>12</sub> | Flavonols         | 20229-56-5  |
| Hesperetin-7-O-glucoside                 | Positive | 16419.00   | C <sub>22</sub> H <sub>24</sub> O <sub>11</sub> | Flavones          | 31712-49-9  |
| Hesperetin-5-O-glucoside                 | Negative | 11927.00   | C <sub>22</sub> H <sub>24</sub> O <sub>11</sub> | Flavanonols       | 69651-80-5  |
| Apigenin-7-O-(6"-acetyl) glucoside       | Positive | 28380.00   | C <sub>23</sub> H <sub>22</sub> O <sub>11</sub> | Flavones          | 72741-92-5  |
| Kaempferol-3-O-(4"-O-acetyl) rhamnoside  | Positive | 35057.00   | C <sub>23</sub> H <sub>22</sub> O <sub>11</sub> | Flavones          | -           |
| 6-C-Methylquercetin-3-O-glucoside        | Positive | 3144.00    | C <sub>22</sub> H <sub>22</sub> O <sub>12</sub> | Flavonols         | -           |
| 6"-O-Acetylglycitin                      | Positive | 557220.00  | C <sub>24</sub> H <sub>24</sub> O <sub>11</sub> | Isoflavones       | 134859-96-4 |
| Kaempferol-3-O-(6"-acetyl) glucoside     | Negative | 952530.00  | C <sub>23</sub> H <sub>22</sub> O <sub>12</sub> | Flavonols         | -           |
| Kaempferol-3-O-(2"-acetyl) glucoside     | Positive | 3674500.00 | C <sub>23</sub> H <sub>22</sub> O <sub>12</sub> | Flavonols         | -           |
| Quercetin-3-O-(2"-acetyl) rhamnoside     | Positive | 7592.90    | C <sub>23</sub> H <sub>22</sub> O <sub>12</sub> | Flavonols         | -           |
| Tricin-5-O-Glucoside                     | Negative | 12845.00   | C <sub>23</sub> H <sub>24</sub> O <sub>12</sub> | Flavones          | 32769-00-9  |
| 6"-O-Malonyldaidzin                      | Positive | 215770.00  | C <sub>24</sub> H <sub>22</sub> O <sub>12</sub> | Isoflavones       | 124590-31-4 |
| Kaempferol-3-O-(2"-O-acetyl) glucuronide | Negative | 106010.00  | C <sub>23</sub> H <sub>20</sub> O <sub>13</sub> | Flavonols         | -           |
| 6"-O-Malonylgenistin                     | Positive | 31107.00   | C <sub>24</sub> H <sub>22</sub> O <sub>13</sub> | Isoflavones       | 51011-05-3  |
| Naringenin-7-O-(6"-malonyl) glucoside    | Positive | 3296.10    | C <sub>24</sub> H <sub>24</sub> O <sub>13</sub> | Flavanols         | -           |
| 6"-O-Malonylglycitin                     | Positive | 6589.20    | C <sub>25</sub> H <sub>24</sub> O <sub>13</sub> | Isoflavones       | 137705-39-6 |
| Procyanidin B1                           | Negative | 30624.00   | C <sub>30</sub> H <sub>26</sub> O <sub>12</sub> | Proanthocyanidins | 20315-25-7  |
| Procyanidin B3                           | Negative | 2411.70    | C <sub>30</sub> H <sub>26</sub> O <sub>12</sub> | Proanthocyanidins | 23567-23-9  |
| Procyanidin B2                           | Negative | 13885.00   | C <sub>30</sub> H <sub>26</sub> O <sub>12</sub> | Proanthocyanidins | 29106-49-8  |
| Apigenin-7-O-(6"-p-Coumaryl) glucoside   | Positive | 14834.00   | C <sub>30</sub> H <sub>26</sub> O <sub>12</sub> | Flavones          | -           |
| Isorhoifolin                             | Positive | 5643.00    | C <sub>27</sub> H <sub>30</sub> O <sub>14</sub> | Flavones          | 552-57-8    |
| Rhoifolin                                | Positive | 7548.50    | C <sub>27</sub> H <sub>30</sub> O <sub>14</sub> | Flavones          | 17306-46-6  |

| Compound                                                  | Ion mode | Peak area | Formula                                         | Class      | CAS         |
|-----------------------------------------------------------|----------|-----------|-------------------------------------------------|------------|-------------|
| Narirutin                                                 | Negative | 6377.30   | C <sub>27</sub> H <sub>32</sub> O <sub>14</sub> | Flavanones | 14259-46-2  |
| Naringin                                                  | Negative | 23435.00  | C <sub>27</sub> H <sub>32</sub> O <sub>14</sub> | Flavanones | 10236-47-2  |
| Kaempferol-3-O-(2"-p-Coumaroyl) galactoside               | Positive | 25450.00  | C <sub>30</sub> H <sub>26</sub> O <sub>13</sub> | Flavones   | -           |
| Kaempferol-3-O-(6"-p-Coumaroyl) galactoside               | Positive | 11176.00  | C <sub>30</sub> H <sub>26</sub> O <sub>13</sub> | Flavones   | -           |
| Tiliroside                                                | Negative | 7414.40   | C <sub>30</sub> H <sub>26</sub> O <sub>13</sub> | Flavones   | 20316-62-5  |
| Castanoside A [Kaempferol-3-O-(6"-p-coumaroyl) mannoside] | Positive | 13934.00  | C <sub>30</sub> H <sub>26</sub> O <sub>13</sub> | Flavones   | -           |
| Luteolin-7-O-(6"-caffeoyl) rhamnoside                     | Negative | 1123.00   | C <sub>30</sub> H <sub>26</sub> O <sub>13</sub> | Flavones   | -           |
| Kaempferol-3-O-neohesperidoside                           | Positive | 9562.10   | C <sub>27</sub> H <sub>30</sub> O <sub>15</sub> | Flavones   | 32602-81-6  |
| Kaempferol-3-O-rhamnosyl (1→2) glucoside                  | Positive | 9246.00   | C <sub>27</sub> H <sub>30</sub> O <sub>15</sub> | Flavonols  | -           |
| Rutin                                                     | Negative | 12282.00  | C <sub>27</sub> H <sub>30</sub> O <sub>16</sub> | Flavonols  | 153-18-4    |
| Quercetin-3-O-glucoside-7-O-rhamnoside                    | Positive | 7419.00   | C <sub>27</sub> H <sub>30</sub> O <sub>16</sub> | Flavonols  | -           |
| Quercetin-3-O-robinobioside                               | Negative | 6797.50   | C <sub>27</sub> H <sub>30</sub> O <sub>16</sub> | Flavonols  | 52525-35-6  |
| Luteolin-7,3'-di-O-glucoside                              | Positive | 7557.50   | C <sub>27</sub> H <sub>30</sub> O <sub>16</sub> | Flavones   | 52187-80-1  |
| Quercetin-3-O-(4"-O-glucosyl) rhamnoside                  | Positive | 8766.80   | C <sub>27</sub> H <sub>30</sub> O <sub>16</sub> | Flavonols  | 59262-54-3  |
| Quercetin-3-O-neohesperidoside                            | Positive | 11836.00  | C <sub>27</sub> H <sub>30</sub> O <sub>16</sub> | Flavonols  | 117611-67-3 |
| Guangsongon N                                             | Positive | 2782.80   | C <sub>35</sub> H <sub>30</sub> O <sub>10</sub> | Flavanones | -           |
| Neohesperidin                                             | Positive | 7706.40   | C <sub>28</sub> H <sub>34</sub> O <sub>15</sub> | Flavanones | 13241-33-3  |
| Hesperidin                                                | Negative | 25349.00  | C <sub>28</sub> H <sub>34</sub> O <sub>15</sub> | Flavanones | 520-26-3    |
| Tamarixetin-3-O-glucoside-7-O-rhamnoside                  | Positive | 60425.00  | C <sub>28</sub> H <sub>32</sub> O <sub>16</sub> | Flavones   | -           |
| Kaempferol-3-O-(2-O-Xylosyl-6-O-Rhamnosyl) Glucoside      | Positive | 4424.00   | C <sub>32</sub> H <sub>38</sub> O <sub>19</sub> | Flavones   | -           |
| Kaempferol-3-O-rutinoside-7-O-glucoside                   | Positive | 59905.00  | C <sub>33</sub> H <sub>40</sub> O <sub>20</sub> | Flavonols  | -           |

**Table S3.** Homologous amino-acid sequences for PAL from 16 species.

| Species                         | Accession ID   | Kingdom                           |
|---------------------------------|----------------|-----------------------------------|
| <i>Tricholoma matsutake</i>     | BAM63315.2     | Agaricales; Tricholomataceae      |
| <i>Pleurotus eryngii</i>        | AHH55203.1     | Agaricales; Pleurotaceae          |
| <i>Flammulina velutipes</i>     | AHD25301.1     | Agaricales; Physalacriaceae       |
| <i>Sparassis crispa</i>         | XP 027611961.1 | Polyporales; Sparassidaceae       |
| <i>Daedalea quercina</i>        | KZT72322.1     | Polyporales                       |
| <i>Laetiporus sulphureus</i>    | XP 040759197.1 | Polyporales                       |
| <i>Cantharellus anzutake</i>    | XP 038919162.1 | Cantharellales; Cantharellaceae   |
| <i>Pyrrhoderma noxium</i>       | PAV24234.1     | Hymenochaetales; Hymenochaetaceae |
| <i>Fomitiporia mediterranea</i> | XP 007262022.1 | Hymenochaetales; Hymenochaetaceae |
| <i>Sanghuangporus baumii</i>    |                | Hymenochaetales; Hymenochaetaceae |
| <i>Inonotus obliquus</i>        | AJD20419.1     | Hymenochaetales; Hymenochaetaceae |
| <i>Aspergillus fumigatus</i>    | KEY77231.1     | Eurotiales; Aspergillaceae        |
| <i>Fusarium langsethiae</i>     | KPA41552.1     | Hypocreales; Nectriaceae          |
| <i>Aspergillus luchuensis</i>   | GAT31350.1     | Eurotiales; Aspergillaceae        |
| <i>Penicillium griseofulvum</i> | XP 040645987.1 | Eurotiales; Aspergillaceae        |
| <i>Arabidopsis thaliana</i>     | NP 187645.1    | Brassicales; Brassicaceae         |

**Figure S1.** Micro-array plot of differentially expressed genes.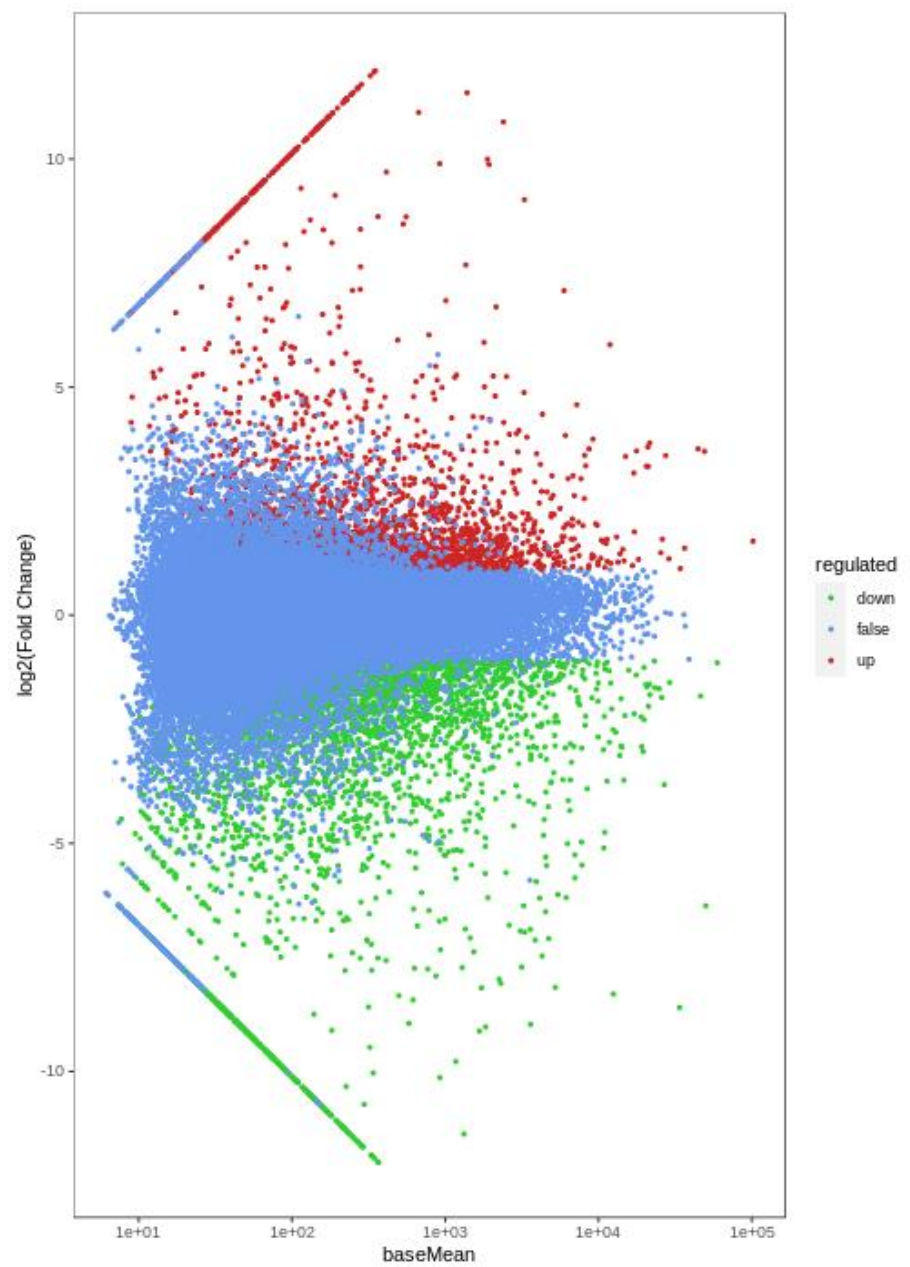

**Figure S2.** The SbPAL 2,493 bp open reading frame and encoded amino acid sequence.

```

1      ATGGTCATCAACTCTGACGGTCACTTCGCGCGTCTCTCATTCAAACCTCAAACCTCGGGTTCGCGGACTACAACCATC
    M V I N S D G H F A R P H S N S N S G S A T T T I
76     GTCTCCCCTCACATCGACCACTCTTACGACAGCTACTATGGTCATGCTATCCCCCTTCGTGTACCAACACCGGAG
    V S P H I D H S Y D S Y Y G H A I P L R V P T P E
151    GACTTGCTCAAGCACAAGGCACTCTGAACCAAGCAGACTGTCTCAAAGACTTCATCGCGTCTACCAGGAGCTC
    D L L K H K A L L N Q A D C L K D F I A S Y Q E L
226    GACTCGTACAAGAACGGCGCTTCCATCAGCCTTACAGGTGATGATCTCACCTCTCTGCAGTCGTAGCCGTCGCA
    D S Y K N G A S I S L T G D D L T L S A V V A V A
301    CGTACCAGAGCTCGTCTCTGAGCTATCGACGAAGCTCTCGCGTCCCTCTCCAAGGACGACTCGCGCGTCCAG
    R Y P E L V S A A I D E A L A S L S K D D A W V Q
376    GCTCTCAACAGCTCACGAAAGATCATCGATGACAGCTCGCGCAGAATAAGAGTATCTATGGTGTGACACCGGT
    A L N S S R K I I D D K L A Q N K S I Y G V S T G
451    TTCGGTGGTAGTGCGGACACTCGTACGGCAGAGCAGATCTACTCGGTTTCGCGCTCCTTCAGCACCAGCATTCG
    F G G S A D T R T A E H D L L G F A L L Q H H S
526    GGTGTCTCCCAGTGGTCTCCAGTCCGTCGCGGATGCCAATGCTAGCTCTGACGCACCGTCTCTGTGCTTCG
    G V L P T G L Q S V A D A N A S S D A P S S A A S
601    ACTACCAAGTCGAGCACTCCCCTCCCCTGAGCTCTTCCGCTTCCTCCCTCTCCATGCCCCCGCATGGACGCGT
    T T K S S T P L P L S S S A S S L S M P A S W T R
676    GCAGCCATGGTAGTTCGTCTCAACTCCCTCTGCGGGACACAGTGTCTGTTCTGTTCCCTCTCAACGCCATG
    A A M V V R L N S L L R G H S A A S V P L L N A M
751    GCGGACTTCTCTCAAGAATATCACGCCTATCGTCCCTCTCCGTGGTTCATCTCCGCTTCAGGCGACTTGTCT
    G G L L S K N I T P I V P L R G S I S A S G D L S
826    CCTCTTTCTTACGTGCGCGGTACGCTCGTCGCGGAGCGAGGCATCTACTGCTACGCACCTAGCGGTGAGAAGCGC
    P L S Y V A G T L V G E R G I Y C Y A P S G E K R
901    CTAGGTGAGGAAGTGGGTATGAGCGGAGAGGAACGAAGTCTCCGTGCACCCGACGCACTCAAATCTGCTGGT
    L G E E L G M S G E G T K V L R A P D A L S A G
976    CTTGAGCCCATCAAGCTCAGACCAAGGAGCAGTAGCGATTTTGAACGGTACGGCCTTCAGTTGTGGAGCAGCT
    L E P I K L R P K E Q L A I L N G T A F S C G A A
1051   GCTCTCTGCGTCGAGGAGCGGCAACTCGTCATGCTCGGGACGGTCTGCACCGCAATGGGCAAGAGCCATG
    A L C V E E A R Q L V M L G T V C T A M G T E A M
1126   CGTGCGTCAGCAGACTCCTTCTGCGAGTTTATCCAGCGCATACGTCCGCAACCCGGGGCAGATCGAGACAGCGCGG
    R G S A D S F C E F I Q R I R P H P G Q I E T G A
1201   CTCCTCACACACTTGTGGAGACCTCGAAGCTCGCTACACGCCATGCTGAGCCCGACACTCTGCCGCGTCAAT
    L L T H L L E T S K L A T R H A E P G H S A A V N
1276   GCGGTTGAGGAGAGCATGACGGAGACCGGAAGGATAAGATCATTGTTGATGAGGAAGTATTGATGCGGATGCC
    G V E E S M T E T G K D K I I V D E E T I D A D A
1351   GGTGTCTTGAGGAGGATCGTTACCCACTCAGGACCGCCCCGAATGGCTCGGTCCGCAACTTGAGACCGTCCAG
    G V L R Q D R Y P L R T A P Q W L G P Q L E T V Q
1426   CGTGCTGCTGAAGTAATTGCTATCGAGTGAATTCTACGACGGATAACCCACTCATCGACCTGCAACTGGTATT
    R A A E V I A I E C N S T T D N P L I D P A T G I
1501   GTCCACCAAGCGGTAATTCGAAGCAATGCGGTCACCTCCGTCTCGAACCCTCCGTCTCTCCCTCTTCAC
    V H H G G N F Q A M A V T S V L E P L R L S L F H
1576   ATCGGCAAGATCCTCTTCGCGCAAGCGACCGAGCTGCAGAACCTCTCATGTGCAATGGGCTGACGGGTAACTCT
    I G K I L F A Q A T E L Q N P L M S N G L
1651   GCCTCCACCGACGCTCCCTCAACTTCGCGGTAAGGGGATCGACATCGCGATGGCCGCGTACGTCGCGGAGCTC
    A S T D A S L N F A G K G I D I A M A A Y V A E L
1726   GCGTACCTTGCGAACCCGGTGAGTACGGCGTGCAGAGCGCCGAGATGCACAACAGGCTGTGAACTCGTTGGCA
    A Y L A N P V S T G V Q S A E M H N Q A V N S L A
1801   TTCGTACGCGCGGTTACACCTCCAGGCGATTGAGATCGTGCAGATGGTTGTTGCGAGCTACATCTACCTCCTC
    F V S A R Y T L Q A I E I V Q M V V A S Y I Y L L
1876   TGCCAGGCTGTGCACTCCGCGCCCTGCAGAAGGAGATGGAAGAGAAGACGAGGAGATCTGAGGAACTTGT
    C Q A V D L R A L Q K E M E E K T Q E I V E L V
1951   AAGGAGCACTTTGCTGCTGGTGAATAATCCGTCAATGCGAAGGAAGTGTCCAAGGCTGTTTGGACGTCATTGAC
    K E H F A A G E N S V N A K E V S K A V W T S F D
2026   ACCTCTGCAACATGGATGCGAAGCCCGTCTGAGAAGGCGCGAAGGCATCTACGCAGCCTCTCGTAGACCAG
    T S A N M D A K P R A E K A A K A S T Q P L V D Q
2101   CTCCTCTCTCCACAGCTCTCCTTCTCACTTTTCATCCCTCCCCGCTTCCAATCGAGCCTCTCCGCGGTATC
    L L S S H S V S F S L S S L P A F Q S S L S A R I
2176   TACAACGACACACCTCCCTCACCACCTCTACCTCTCTTCCACCGCTTCCCCGCTCTCGCTGCGTACCTCCCA
    Y N A H T S L T T S Y L S S T A S P S L P
2251   GCCCTCAGCTCCTCGGGCGCACAAGTCCCTCTACGCGTTCTGTCGCTCGCCGCTCTCCAGGCTGGGTTAGGC
    A L Q L L G R T K S L Y A F V R S P V S Q G G L G
2326   ATCGCATGACGAGATACGAGAACCTTCAGAAATTCGTGACGGGCTCGGGAACGGCGACGAGTGGC
    I G M H G Y E N L Q K F V D G L G N G D A S K R G
2401   ACGATCGGTGGGACGTGACGCGGATACGAGAGCATTCGCGATGGACGCATGGGCCGCTCGTCTGTTAGCATG
    T I G G D V S A I Y E S I R D G R M G R V V V S M
2476   TTTGCGGCTGAGGAGTGA
    F A A E E *

```

**Figure S3.** PCR gel electrophoresis results for the resistant strains (M: marker; N: negative control; P: positive control; 1, 2: Band for the hph gene; 3, 4: Band for the PAL gene initiated by a gpd promoter).

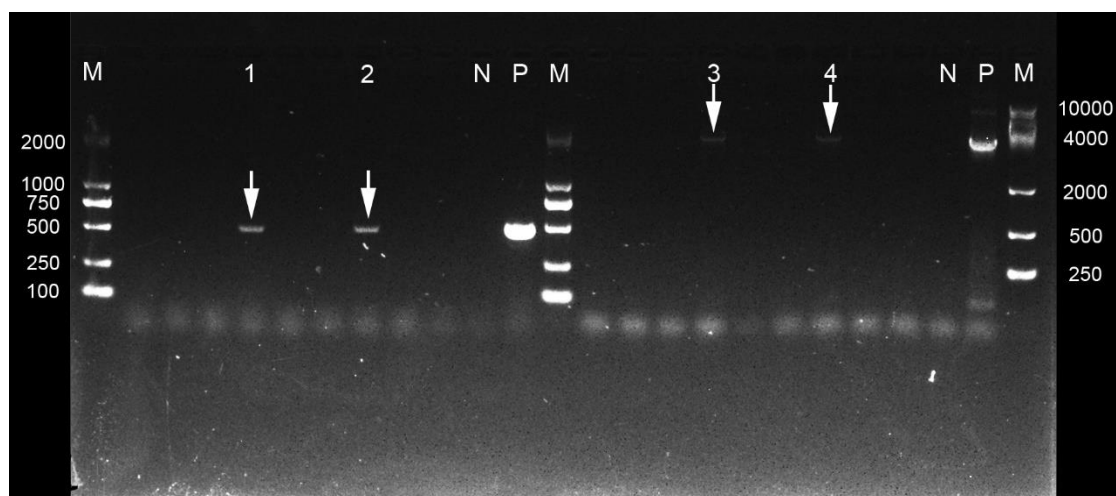

Supplement: s1 [file s1]
